# Supplementary material for: From Earlier Exploration to Advanced Applications: Bibliometric and Systematic Review of Augmented Reality in the Tourism Industry (2002–2022)
Source: MDPI journal article supplement (doi:10.3390/mti7070064), 2023-06-26
Supplement: s1 [file s1]

Archive with 2 entries (2 files):
- Supplemental table S1.pdf
- PRISMA_2020_checklist.pdf
