# Supplementary material for: From Earlier Exploration to Advanced Applications: Bibliometric and Systematic Review of Augmented Reality in the Tourism Industry (2002–2022)
Source: MDPI journal article supplement (doi:10.3390/mti7070064), 2023-06-26
Supplement: s1 [file s1]

**Supplemental Table S 1:** Summary of the studies (n=57) included in the systematic review.

| (Author(s), year)                      | References | DOI                                                                                                                       | Type of article  | AR system       | Tourism setting | AR device         | Virtual content |
|----------------------------------------|------------|---------------------------------------------------------------------------------------------------------------------------|------------------|-----------------|-----------------|-------------------|-----------------|
| (Abidin et al., 2018)                  | [58]       | <a href="https://doi.org/10.18517/ijaseit.8.4-2.6822">https://doi.org/10.18517/ijaseit.8.4-2.6822</a>                     | Journal article  | Markerless      | Outdoor         | Handheld          | Visual          |
| (Affan et al., 2018)                   | [63]       | <a href="https://doi.org/10.12928/TELKOMNIKA.v16i4.7759">https://doi.org/10.12928/TELKOMNIKA.v16i4.7759</a>               | Journal article  | Marker          | Outdoor         | Handheld          | Visual          |
| (Agustina et al., 2018)                | [64]       | <a href="https://doi.org/10.1088/1757-899X/434/1/012265">https://doi.org/10.1088/1757-899X/434/1/012265</a>               | Conference paper | Marker          | Indoor          | Handheld          | Visual          |
| (Amato et al., 2013)                   | [51]       | <a href="https://doi.org/10.1145/2536853.2536878">https://doi.org/10.1145/2536853.2536878</a>                             | Conference paper | Marker (hybrid) | Indoor/Outdoor  | Handheld          | visual          |
| (Basori et al., 2019)                  | [45]       | <a href="https://doi.org/10.1016/j.procs.2019.12.091">https://doi.org/10.1016/j.procs.2019.12.091</a>                     | Conference paper | Markerless      | Outdoor         | Handheld          | Visual          |
| (Besharat et al., 2016)                | [67]       | <a href="https://doi.org/10.3233/AIS-160395">https://doi.org/10.3233/AIS-160395</a>                                       | Journal article  | Marker          | Outdoor         | Handheld          | Visual          |
| (Bibiloni et al., 2016)                | [53]       | <a href="https://doi.org/10.1007/978-3-319-38907-3_5">https://doi.org/10.1007/978-3-319-38907-3_5</a>                     | Book section     | Marker          | unclear         | Handheld          | Visual          |
| (Bird et al., 2022)                    | [57]       | <a href="https://doi.org/10.1177/00472875221134031">https://doi.org/10.1177/00472875221134031</a>                         | Journal article  | Markerless      | Indoor          | HMD               | Visual          |
| (Boboc et al., 2019)                   | [92]       | <a href="https://doi.org/10.3390/su11041167">https://doi.org/10.3390/su11041167</a>                                       | Journal article  | Markerless      | Outdoor         | Handheld          | Multisensory    |
| (C. Boletsis and Chasanidou, 2018)     | [78]       | <a href="https://doi.org/10.1145/3240167.3240243">https://doi.org/10.1145/3240167.3240243</a>                             | Conference paper | Markerless      | Outdoor         | HMD               | Auditory        |
| (Costas Boletsis and Chasanidou, 2018) | [35]       | <a href="https://doi.org/10.1145/3197768.3201549">https://doi.org/10.1145/3197768.3201549</a>                             | Conference paper | Markerless      | Outdoor         | Handheld          | Auditory        |
| (Cejka et al., 2021)                   | [48]       | <a href="https://doi.org/10.1109/ACCESS.2021.3059978">https://doi.org/10.1109/ACCESS.2021.3059978</a>                     | Journal paper    | Hybrid          | Outdoor         | Handheld          | Visual          |
| (Chen, 2014)                           | [79]       | <a href="https://doi.org/10.1016/j.procs.2014.08.180">https://doi.org/10.1016/j.procs.2014.08.180</a>                     | Conference paper | Markerless      | Outdoor         | Handheld          | Visual          |
| (Chendeb et al., 2013)                 | [80]       | <a href="https://doi.org/10.5194/isprsarchives-XL-2-W2-25-2013">https://doi.org/10.5194/isprsarchives-XL-2-W2-25-2013</a> | Conference paper | Markerless      | Outdoor         | Telescope/desktop | Visual          |

|                               |      |                                                                                                                   |                  |            |         |          |              |
|-------------------------------|------|-------------------------------------------------------------------------------------------------------------------|------------------|------------|---------|----------|--------------|
| (Chong and Alimardanov, 2021) | [60] | <a href="https://doi.org/10.1007/978-3-030-68452-5_31">https://doi.org/10.1007/978-3-030-68452-5_31</a>           | Conference paper | Markerless | Outdoor | Handheld | Auditory     |
| (Cibilic et al., 2021)        | [93] | <a href="https://doi.org/10.5194/ica-proc-4-21-2021">https://doi.org/10.5194/ica-proc-4-21-2021</a>               | Conference paper | Markerless | Outdoor | Handheld | Visual       |
| (Demir and Karaarslan, 2018)  | [81] | <a href="https://doi.org/10.1109/SGCF.2018.8408965">https://doi.org/10.1109/SGCF.2018.8408965</a>                 | Conference paper | Markerless | Outdoor | Handheld | Visual       |
| (Dewi Agushinta et al., 2019) | [68] | <a href="https://doi.org/10.1088/1742-6596/1196/1/012060">https://doi.org/10.1088/1742-6596/1196/1/012060</a>     | Conference paper | Marker     | Outdoor | Handheld | Visual       |
| (Fakhour et al., 2020)        | [82] | <a href="https://doi.org/10.1007/978-3-030-36653-7_1">https://doi.org/10.1007/978-3-030-36653-7_1</a>             | Book section     | Markerless | Outdoor | HMD      | Auditory     |
| (Fino et al., 2013)           | [73] | <a href="https://doi.org/10.1016/j.procs.2013.11.040">https://doi.org/10.1016/j.procs.2013.11.040</a>             | Conference paper | Marker     | Outdoor | Handheld | Visual       |
| (Flores et al., 2019)         | [94] | <a href="https://doi.org/10.35940/ijrte.B1345.0982S1119">https://doi.org/10.35940/ijrte.B1345.0982S1119</a>       | Journal article  | Markerless | Outdoor | Handheld | Visual       |
| (Galih et al., 2019)          | [83] | <a href="https://doi.org/10.13189/ujeee.2019.061307">https://doi.org/10.13189/ujeee.2019.061307</a>               | Journal article  | Markerless | Outdoor | Handheld | Visual       |
| (Gutierrez et al., 2015)      | [69] | <a href="https://doi.org/10.1016/j.procs.2015.12.262">https://doi.org/10.1016/j.procs.2015.12.262</a>             | Conference paper | Marker     | Outdoor | Handheld | Multisensory |
| (Han et al., 2018)            | [70] | <a href="https://doi.org/10.1080/1743873X.2016.1251931">https://doi.org/10.1080/1743873X.2016.1251931</a>         | Journal article  | Hybrid     | Outdoor | Handheld | multisensory |
| (Han et al., 2019)            | [91] | <a href="https://doi.org/10.1080/02614367.2019.1604790">https://doi.org/10.1080/02614367.2019.1604790</a>         | Journal article  | Markerless | Indoor  | HMD      | Multisensory |
| (Haryani and Triyono, 2020)   | [65] | <a href="https://doi.org/10.30630/joiv.4.1.157">https://doi.org/10.30630/joiv.4.1.157</a>                         | Journal article  | Marker     | Indoor  | Handheld | Visual       |
| (Huo et al., 2018)            | [95] | <a href="https://doi.org/10.1051/mateconf/201824603014">https://doi.org/10.1051/mateconf/201824603014</a>         | Conference paper | Markerless | Outdoor | Handheld | Visual       |
| (Kadi et al., 2017)           | [84] | <a href="https://doi.org/10.1109/ICSITech.2017.8257110">https://doi.org/10.1109/ICSITech.2017.8257110</a>         | Conference paper | Markerless | Outdoor | Handheld | Visual       |
| (Kaghat et al., 2020)         | [56] | <a href="https://doi.org/10.1016/j.compeleceng.2020.106606">https://doi.org/10.1016/j.compeleceng.2020.106606</a> | Journal article  | Markerless | Indoor  | HMD      | Auditory     |
| (Li et al., 2022)             | [74] | <a href="https://doi.org/10.3389/fpsyg.2022.943277">https://doi.org/10.3389/fpsyg.2022.943277</a>                 | Journal article  | Marker     | Outdoor | Handheld | Visual       |

|                                      |      |                                                                                                         |                  |                     |         |              |              |
|--------------------------------------|------|---------------------------------------------------------------------------------------------------------|------------------|---------------------|---------|--------------|--------------|
| (Lin and Chen, 2017)                 | [54] | <a href="https://doi.org/10.3390/sym9070113">https://doi.org/10.3390/sym9070113</a>                     | Journal article  | Marker              | Unclear | Handheld     | Visual       |
| (Lipianina-Honcharenko et al., 2022) | [49] | <a href="https://doi.org/10.47839/ijc.21.2.2596">https://doi.org/10.47839/ijc.21.2.2596</a>             | Journal article  | Markerless (hybrid) | Outdoor | Handheld     | Visual       |
| (Litvak and Kuflik, 2020)            | [85] | <a href="https://doi.org/10.1007/s00779-020-01366-7">https://doi.org/10.1007/s00779-020-01366-7</a>     | Journal article  | Markerless          | Outdoor | Handheld/HMD | Multisensory |
| (Marto et al., 2021)                 | [46] | <a href="https://doi.org/10.1109/ACCESS.2021.3050974">https://doi.org/10.1109/ACCESS.2021.3050974</a>   | Journal article  | Markerless          | Outdoor | Handheld     | Multisensory |
| (Mendes et al., 2019)                | [47] | <a href="https://doi.org/10.3390/A12070140">https://doi.org/10.3390/A12070140</a>                       | Journal article  | Markerless          | Indoor  | Spatial      | Visual       |
| (Mendoza et al., 2015)               | [59] | <a href="https://doi.org/10.1016/j.procs.2015.12.244">https://doi.org/10.1016/j.procs.2015.12.244</a>   | Conference paper | Markerless          | Outdoor | Handheld     | Visual       |
| (Messelodi et al., 2015)             | [96] | <a href="https://doi.org/10.1007/978-3-319-23234-8_19">https://doi.org/10.1007/978-3-319-23234-8_19</a> | Book section     | Markerless          | Outdoor | Handheld     | Visual       |
| (Paliokas et al., 2020)              | [55] | <a href="https://doi.org/10.3390/app10217868">https://doi.org/10.3390/app10217868</a>                   | Journal article  | Marker              | Indoor  | Handheld     | Visual       |
| (Panou et al., 2018)                 | [61] | <a href="https://doi.org/10.3390/ijgi7120463">https://doi.org/10.3390/ijgi7120463</a>                   | Journal article  | Markerless (hybrid) | Outdoor | Handheld     | Visual       |
| (Pu et al., 2017)                    | [43] | <a href="https://doi.org/10.18517/ijaseit.7.1.1797">https://doi.org/10.18517/ijaseit.7.1.1797</a>       | Journal article  | Marker              | Unclear | Handheld     | Visual       |
| (Rezaee et al., 2021)                | [86] | <a href="https://doi.org/10.3390/app11136047">https://doi.org/10.3390/app11136047</a>                   | Journal article  | Markerless          | Outdoor | Handheld     | Visual       |
| (Rodrigues et al., 2019)             | [44] | <a href="https://doi.org/10.1109/ACCESS.2019.2953003">https://doi.org/10.1109/ACCESS.2019.2953003</a>   | Journal article  | Marker              | Indoor  | Handheld     | Multisensory |
| (Rokhsaritalemi et al., 2022)        | [87] | <a href="https://doi.org/10.3390/app12105241">https://doi.org/10.3390/app12105241</a>                   | Journal article  | Markerless          | Outdoor | Handheld     | Visual       |
| (Sasaki and Yamamoto, 2019)          | [75] | <a href="https://doi.org/10.3390/ijgi8090381">https://doi.org/10.3390/ijgi8090381</a>                   | Journal article  | Hybrid              | Outdoor | Handheld     | Visual       |
| (Shih et al., 2020)                  | [71] | <a href="https://doi.org/10.3390/su12219262">https://doi.org/10.3390/su12219262</a>                     | Journal article  | Marker              | Outdoor | Handheld     | Visual       |
| (Shih et al., 2019)                  | [62] | <a href="https://doi.org/10.3390/s19173725">https://doi.org/10.3390/s19173725</a>                       | Journal article  | Hybrid              | Outdoor | Handheld     | Visual       |

|                              |      |                                                                                                               |                  |            |                |          |              |
|------------------------------|------|---------------------------------------------------------------------------------------------------------------|------------------|------------|----------------|----------|--------------|
| (Shin and Choi, 2021)        | [50] | <a href="https://doi.org/10.3390/electronics10202552">https://doi.org/10.3390/electronics10202552</a>         | Journal article  | Markerless | Indoor         | Handheld | Visual       |
| (Tahyudin and Saputra, 2017) | [72] | <a href="https://doi.org/10.11591/ijece.v7i6.pp3500-3506">https://doi.org/10.11591/ijece.v7i6.pp3500-3506</a> | Journal article  | Hybrid     | Outdoor        | Handheld | Visual       |
| (Tatić, 2022)                | [76] | <a href="https://doi.org/10.55630/dipp.2022.12.12">https://doi.org/10.55630/dipp.2022.12.12</a>               | Conference paper | Marker     | Outdoor        | Handheld | Visual       |
| (tom Dieck and Jung, 2018)   | [52] | <a href="https://doi.org/10.1080/13683500.2015.1070801">https://doi.org/10.1080/13683500.2015.1070801</a>     | Journal article  | Hybrid     | Indoor/Outdoor | Handheld | Multisensory |
| (tom Dieck et al., 2016)     | [42] | <a href="https://doi.org/10.1108/IHTT-09-2015-0036">https://doi.org/10.1108/IHTT-09-2015-0036</a>             | Journal article  | Marker     | Indoor         | HMD      | Visual       |
| (tom Dieck et al., 2018a)    | [77] | <a href="https://doi.org/10.1016/j.chb.2017.12.043">https://doi.org/10.1016/j.chb.2017.12.043</a>             | Journal article  | Marker     | Outdoor        | Handheld | Multisensory |
| (tom Dieck et al., 2018b)    | [66] | <a href="https://doi.org/10.1080/13683500.2016.1224818">https://doi.org/10.1080/13683500.2016.1224818</a>     | Journal article  | Marker     | Indoor         | HMD      | Visual       |
| (Wegrzyn and Moscicka, 2017) | [88] | <a href="https://doi.org/10.1515/geocart-2017-0018">https://doi.org/10.1515/geocart-2017-0018</a>             | Journal article  | Markerless | Outdoor        | Handheld | Visual       |
| (Williams et al., 2017)      | [89] | <a href="https://doi.org/10.14236/ewic/HCI2017.1">https://doi.org/10.14236/ewic/HCI2017.1</a>                 | Conference paper | Markerless | Outdoor        | handheld | Visual       |
| (Yovcheva et al., 2014)      | [28] | <a href="https://doi.org/10.4018/ijmhci.2014040102">https://doi.org/10.4018/ijmhci.2014040102</a>             | Journal article  | Markerless | Outdoor        | Handheld | Visual       |
| (Zaifri et al., 2018)        | [90] | <a href="https://doi.org/10.1109/ISACV.2018.8354051">https://doi.org/10.1109/ISACV.2018.8354051</a>           | Conference paper | Markerless | Outdoor        | Handheld | Visual       |
